# Supplementary material for: Molecular Mechanism of Matrine fromSophora alopecuroidesin the Reversing Effect of Multi-Anticancer Drug Resistance in K562/ADR Cells
Source: Hindawi journal article supplement (doi:10.1155/2019/1269532), 2019-11-22
Supplement: f1 [file 1269532.f1.zip]

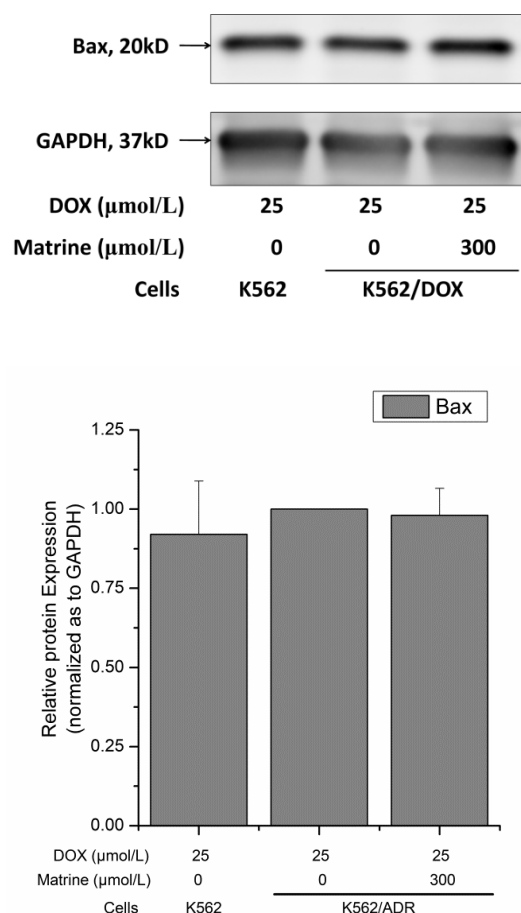

**Fig. S2 Matrine did not suppress Bax expression in K562/ADR cells.** K562 cells and K562/ADR cells with 25μmol/L doxorubicin (DOX) and 0 or 300 μmol/L matrine were cultured for 48 h. Total protein of Bax was extracted for western blotting analysis. The density of bands was measured and employed as quantification of protein. All the data were expressed as mean ± SD of three independent experiments.
