# Supplementary material for: Molecular Mechanism of Matrine fromSophora alopecuroidesin the Reversing Effect of Multi-Anticancer Drug Resistance in K562/ADR Cells
Source: Hindawi journal article supplement (doi:10.1155/2019/1269532), 2019-11-22
Supplement: f1 [file 1269532.f1.zip]

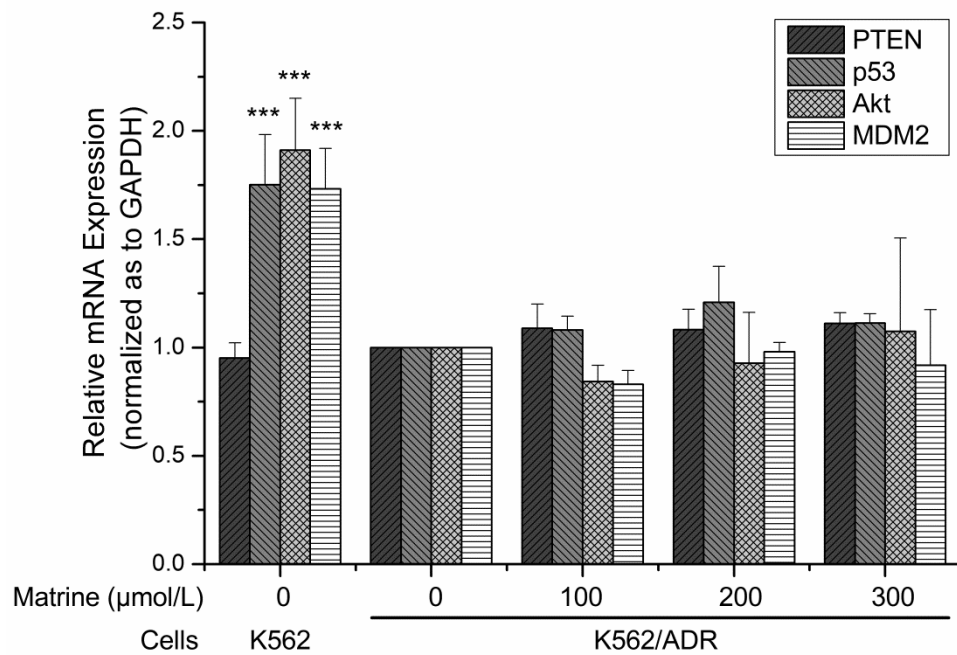

**Fig. S1 Matrine did not influence mRNA expressions of PTEN, p53, Akt, or MDM2 in K562/ADR cells.** K562 cells and K562/ADR cells with 0, 100, 200, or 300 μmol/L matrine were cultured for 48 h. Total RNA was extracted and synthesized into cDNA for quantitative real-time PCR analysis. Ct values were obtained, and the relative expression of mRNA was quantified using  $2^{-\Delta\Delta C_t}$  assay. All the data were expressed as mean  $\pm$  SD of three independent experiments (\*\*\*) ( $P < 0.001$ ).
