# Supplementary material for: Molecular Mechanism of Matrine fromSophora alopecuroidesin the Reversing Effect of Multi-Anticancer Drug Resistance in K562/ADR Cells
Source: Hindawi journal article supplement (doi:10.1155/2019/1269532), 2019-11-22
Supplement: f1 [file 1269532.f1.zip]

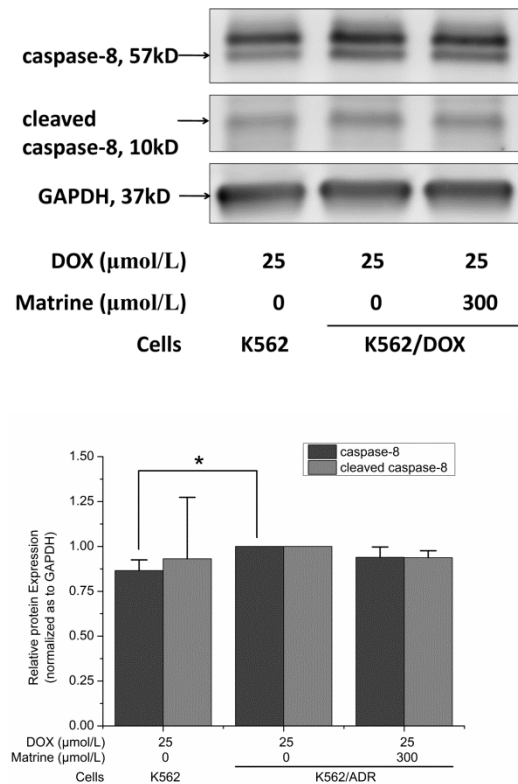

**Fig. S3 Matrine did not induce activation of caspase-8.** K562 cells and K562/ADR cells with 25μmol/L doxorubicin (DOX) and 0 or 300 μmol/L matrine were cultured for 48 h. Total protein of caspase-8 and cleaved caspase-8 was extracted for western blotting analysis. The density of bands was measured and employed as quantification of protein. All the data were expressed as mean ± SD of three independent experiments (\*P < 0.05).
