# Supplementary material for: Molecular Mechanism of Matrine fromSophora alopecuroidesin the Reversing Effect of Multi-Anticancer Drug Resistance in K562/ADR Cells
Source: Hindawi journal article supplement (doi:10.1155/2019/1269532), 2019-11-22
Supplement: f1 [file 1269532.f1.zip]

**Table S1 Primers for quantitative real-time PCR**

| Gene  | Accession NO. in  |                | Sequence (5' to 3')       | T <sub>m</sub> | Annealing        |
|-------|-------------------|----------------|---------------------------|----------------|------------------|
|       | Forward/Reverse   | Genbank        |                           | (°C)           | Temperature (°C) |
| GAPDH | Forward 249-268   | NM_002046.7    | GCACCGTCAAGGCTGAGAAC      | 61.57          | 60               |
|       | Reverse 386-368   |                | TGGTGAAGACGCCAGTGGA       | 61.14          | 60               |
| ABCB1 | Forward 3592-3611 | NM_001348946.1 | AGGCCAACATACATGCCTTC      | 58.23          | 60               |
|       | Reverse 3676-3657 |                | CCACCAGAGAGCTGAGTTCC      | 59.75          | 60               |
| ABCC1 | Forward 3427-3446 | NM_004996.4    | CCTGTTCAACGTCATTGGTG      | 57.31          | 60               |
|       | Reverse 3541-3522 |                | AGCCACGTAGAACCTCTGGA      | 60.25          | 60               |
| ABCG2 | Forward 710-729   | NM_004827.3    | TTCGGCTTGCAACAACATG       | 57.01          | 60               |
|       | Reverse 837-818   |                | TCCAGACACACCACGGATAA      | 58.37          | 60               |
| PTEN  | Forward 1877-1901 | NM_001304718.2 | GAGCGTGCAGATAATGACAAGGAAT | 61.71          | 60               |
|       | Reverse 2028-2004 |                | GGATTTGACGGCTCCTCTACTGTTT | 62.82          | 60               |
| p53   | Forward 853-873   | NM_014477.3    | ACAAGGTTGATGTGACCTGGA     | 59.23          | 60               |
|       | Reverse 957-937   |                | TGTAGACTCGTGAATTCGCC      | 58.4           | 60               |
| Akt   | Forward 247-266   | NM_001626.6    | ACGATGAATGAGGTGTCTGT      | 56.57          | 60               |
|       | Reverse 425-406   |                | TCTGCTACGGTGAAGTTGTT      | 57.1           | 60               |
| MDM2  | Forward 1625-1648 | NM_002392.5    | CCATTGAACCTTGTGTGATTGTC   | 59.02          | 60               |
|       | Reverse 1739-1715 |                | TTCCTTTTCTTTAGCTTCTTTGCAC | 58.73          | 60               |

Primers we used in quantitative real-time PCR was synthesized by Eurofins Genomics (Tokyo, Japan). The data was from Genbank and BLAST.
