# Supplementary material for: Molecular Mechanism of Matrine from Sophora alopecuroides in the Reversing Effect of Multi-Anticancer Drug Resistance in K562/ADR Cells
Source: Biomed Res Int. 2019 Nov 22;2019:1269532. doi: 10.1155/2019/1269532 (PMC6906886; doi:10.1155/2019/1269532)
Supplement: Supplementary Materials — Table S1: primers for quantitative real-time PCR. Figure S1: matrine did not influence mRNA expressions of PTEN, p53, Akt, or MDM2 in K562/ADR cells. Figure S2: matrine did not suppress Bax expression in K562/ADR cells. Figure S3: matrine did not induce activation of caspase-8. [file 1269532.f1.zip]

Archive with 4 entries (4 files):
- 1269532.f1/Fig. S1.pdf
- 1269532.f1/Fig. S2.pdf
- 1269532.f1/Fig. S3.pdf
- 1269532.f1/Table S1.pdf
